# Supplementary material for: Ephemeral-habitat colonization and neotropical species richness of Caenorhabditis nematodes
Source: PubMed Central journal article supplement (PMC5738176; doi:10.1186/s12898-017-0150-z), 2017-12-19

**Additional File 7. Micro-habitat colonization and age-dependent incidence: Map of *Caenorhabditis* species recovery on baits (N=216) distributed at 72 spots along trail system (Parare, Nouragues Natural Reserve).**

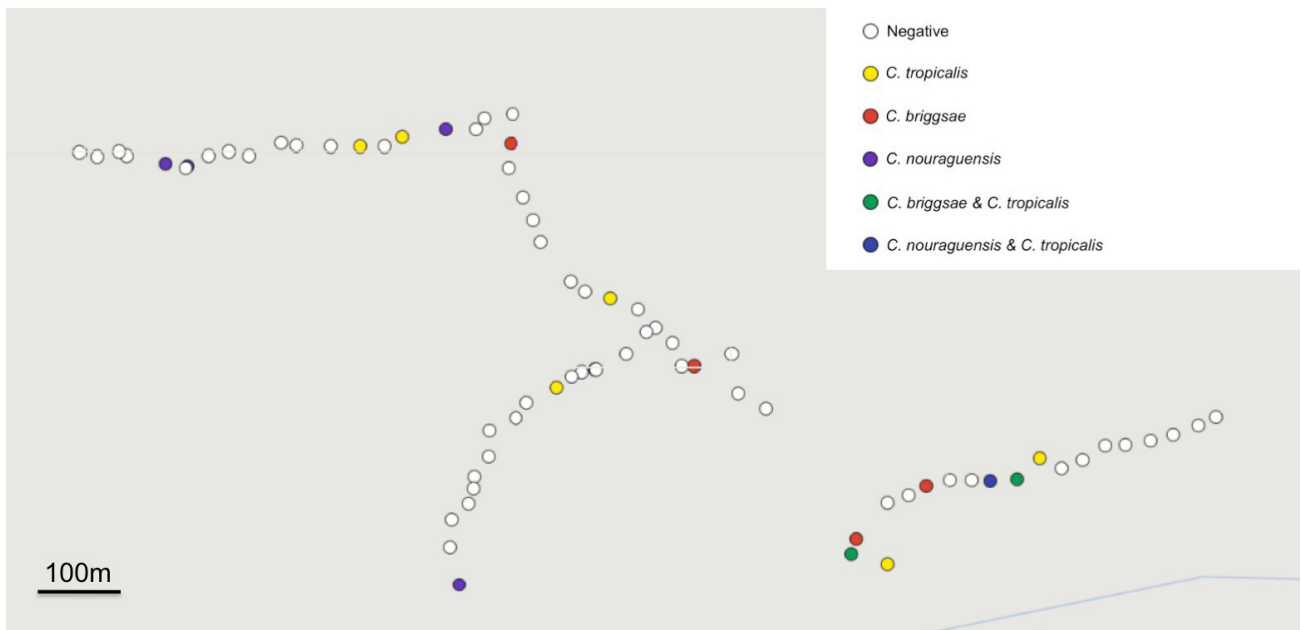

Supplement: 12898_2017_150_MOESM7_ESM.pdf [file 12898_2017_150_MOESM7_ESM.pdf]
