# Supplementary material for: Ephemeral-habitat colonization and neotropical species richness of Caenorhabditis nematodes
Source: PubMed Central journal article supplement (PMC5738176; doi:10.1186/s12898-017-0150-z), 2017-12-19

**Additional File 9. Map of opportunistic samples and *Caenorhabditis* species distribution at the Inselberg site (Nouragues Natural Reserve) (N=278).**

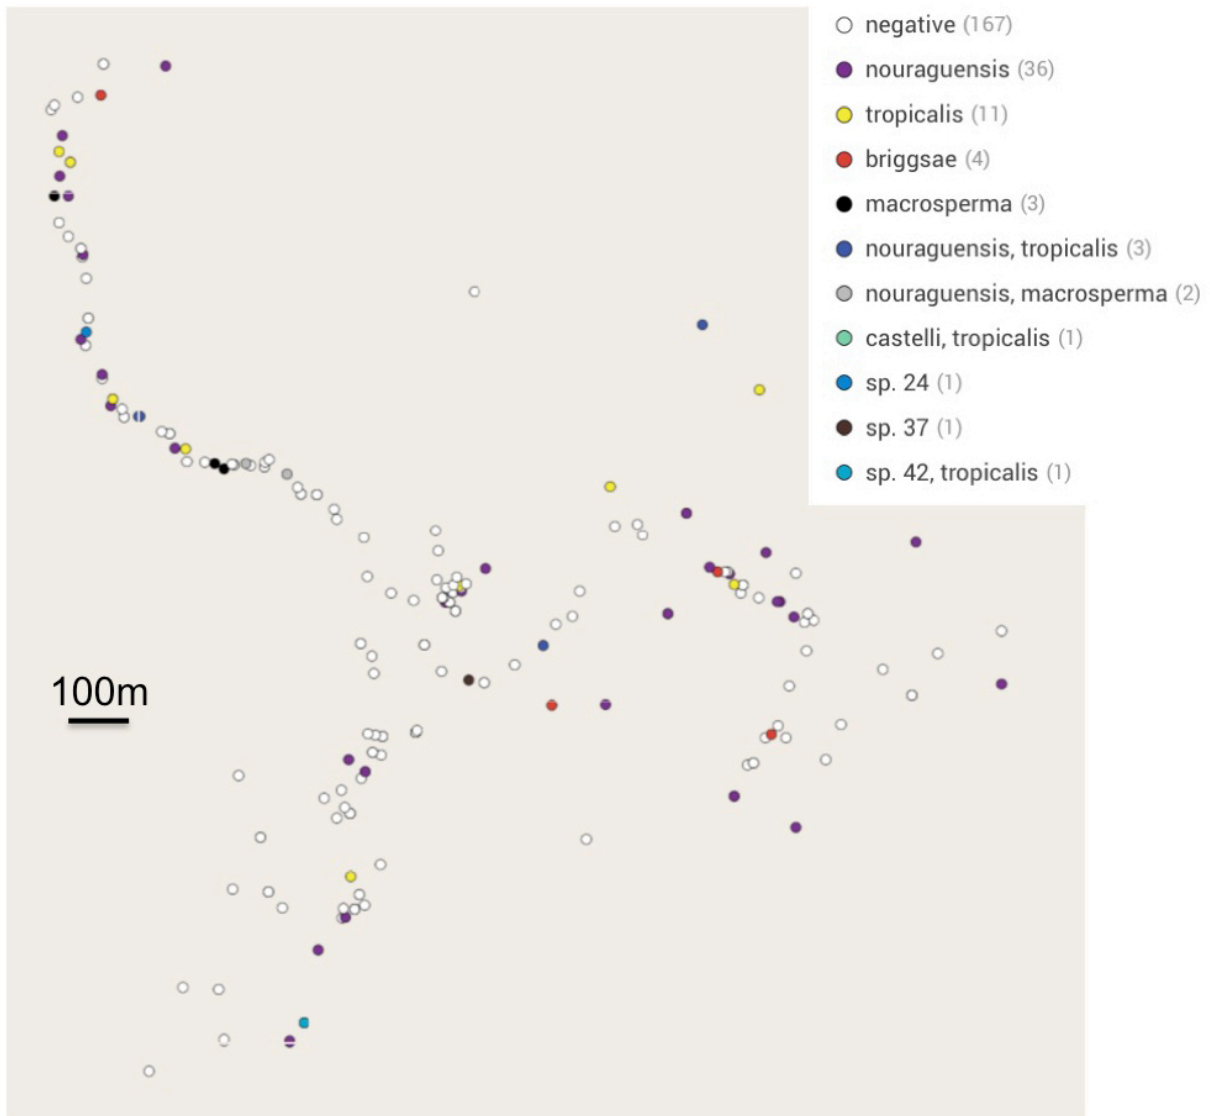

Supplement: 12898_2017_150_MOESM9_ESM.pdf [file 12898_2017_150_MOESM9_ESM.pdf]
