# Supplementary material for: Ephemeral-habitat colonization and neotropical species richness of Caenorhabditis nematodes
Source: PubMed Central journal article supplement (PMC5738176; doi:10.1186/s12898-017-0150-z), 2017-12-19
Supplement: 12898_2017_150_MOESM12_ESM.pdf [file 12898_2017_150_MOESM12_ESM.pdf]

**A) *C. dolens* NIC394**

Cross 1: *C. dolens* (strain NIC394) x *C. angaria* (strain PS1010)

NIC394 male x PS1010 female: no embryos (4 replicates)

PS1010 male x NIC394 female: no embryos (3 replicates)

Cross 2: *C. dolens* (strain NIC394) x *C. castelli* (strain JU1426)

NIC394 male x JU1426 female: dead embryos (3 replicates)

JU1426 male x NIC394 female: no embryos (3 replicates)

Cross 3: *C. dolens* (strain NIC394) x *C. astrocarya* (strain NIC1040)

NIC394 male x NIC1040 female: no embryos (6 replicates)

NIC1040 male x NIC394 female: few dead embryos (7 replicates)

---

**B) *C. astrocarya* NIC1040**

Cross 1: *C. astrocarya* (strain NIC1040) x *C. guadeloupensis* (strain NIC113)

NIC1040 male x NIC113 female: no embryos (2 replicates)

NIC113 male x NIC1040 female: no embryos (2 replicates)

Cross 2: *C. astrocarya* (strain NIC1040) x *C. dolens* (strain NIC394)

NIC1040 male x NIC394 female: few dead embryos (7 replicates)

NIC394 male x NIC1040 female: no embryos (6 replicates)
