# Supplementary material for: Ephemeral-habitat colonization and neotropical species richness of Caenorhabditis nematodes
Source: PubMed Central journal article supplement (PMC5738176; doi:10.1186/s12898-017-0150-z), 2017-12-19

**Additional File 15. Images of *Astrocaryum* palms (likely *Astrocaryum paramaca*) and inflorescence, representing the micro-habitat of the novel species, *C. astrocarya* (Nouragues Natural Reserve).**

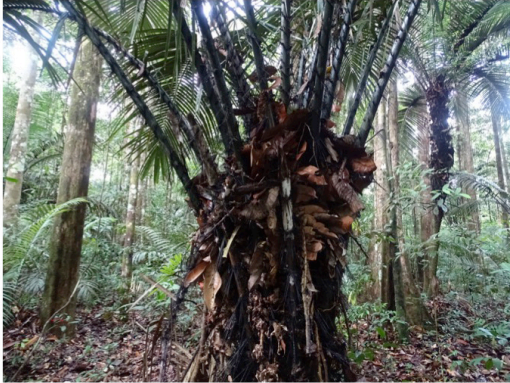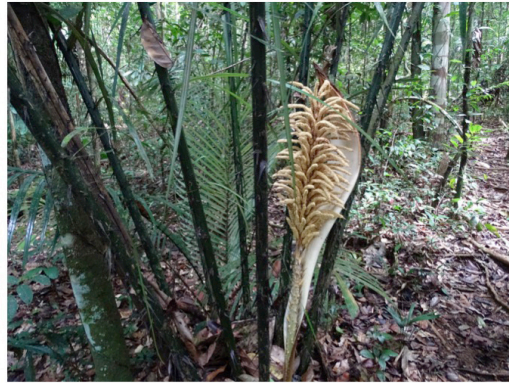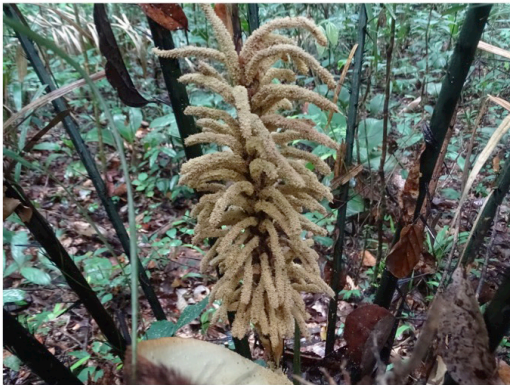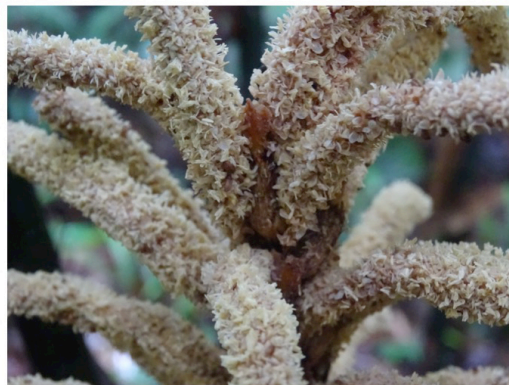

Supplement: 12898_2017_150_MOESM15_ESM.pdf [file 12898_2017_150_MOESM15_ESM.pdf]
